# Supplementary material for: Sinonasal Inverted Papilloma–Associated and De Novo Squamous Cell Carcinoma: A Tale of Two Cities or Not
Source: MDPI journal article supplement (doi:10.3390/cancers14215211), 2022-10-24
Supplement: s1 [file s1]

**Table S3. Details of patients with regional relapse.**

| Characteristics                       | IP-SCC<br>N = 7 (%) | DN-SCC<br>N = 12 (%) |
|---------------------------------------|---------------------|----------------------|
| Primary site                          |                     |                      |
| Nasal cavity                          | 3 (42.9)            | 4 (33.3)             |
| Maxillary sinus                       | 3 (42.9)            | 6 (50.0)             |
| Ethmoid sinus                         | 1 (14.3)            | 2 (16.7)             |
| Lymph node metastasis at presentation |                     |                      |
| Yes                                   | 0 (0.0)             | 3 (25.0)             |
| No                                    | 7 (100.0)           | 9 (75.0)             |
| TNM stage (AJCC 8 <sup>th</sup> )     |                     |                      |
| III                                   | 0 (0.0)             | 3 (25.0)             |
| IVA                                   | 3 (42.9)            | 5 (41.7)             |
| IVB                                   | 4 (57.1)            | 4 (33.3)             |
| Treatment modalities                  |                     |                      |
| Surgery plus radiotherapy             | 7 (100.0)           | 7 (58.3)             |
| Radiotherapy                          | 0 (0.0)             | 5 (41.7)             |
| Neck irradiation                      |                     |                      |
| Yes                                   | 4 (57.1)            | 8 (66.7)             |
| No                                    | 3 (42.9)            | 4 (33.3)             |
| Recurrence category                   |                     |                      |
| In-field                              | 3 (42.9)            | 5 (41.7)             |
| Out-field                             | 3 (42.9)            | 6 (50.0)             |
| Unknown                               | 1 (14.3)            | 1 (8.3)              |
| Prior or concomitant local recurrence |                     |                      |
| Prior local recurrence                | 3 (42.9)            | 2 (16.7)             |
| Concomitant local recurrence          | 3 (42.9)            | 4 (33.3)             |
| Without local recurrence              | 1 (14.3)            | 6 (50.0)             |
