# Supplementary material for: Sinonasal Inverted Papilloma–Associated and De Novo Squamous Cell Carcinoma: A Tale of Two Cities or Not
Source: MDPI journal article supplement (doi:10.3390/cancers14215211), 2022-10-24
Supplement: s1 [file s1]

**Table S1. Cox Proportional Hazards Regression Analysis of Survival.**

| Characteristics                   | DFS                 |         | DSS                 |         | OS                  |         |
|-----------------------------------|---------------------|---------|---------------------|---------|---------------------|---------|
|                                   | HR (95%CI)          | p-value | HR (95%CI)          | p-value | HR (95%CI)          | p-value |
| Age, years                        |                     |         |                     |         |                     |         |
| ≤ 54                              | Ref                 |         | Ref                 |         | Ref                 |         |
| > 54                              | 1.118 (0.778-1.606) | 0.546   | 1.394 (0.941-2.065) | 0.098   | 1.590 (1.100-2.299) | 0.014   |
| Gender                            |                     |         |                     |         |                     |         |
| Male                              | Ref                 |         | Ref                 |         | Ref                 |         |
| Female                            | 0.583 (0.377-0.901) | 0.015   | 0.756 (0.475-1.201) | 0.236   | 0.849 (0.557-1.295) | 0.448   |
| Primary site                      |                     |         |                     |         |                     |         |
| Nasal cavity                      | Ref                 |         | Ref                 |         | Ref                 |         |
| Maxillary sinus                   | 1.140 (0.639-2.035) | 0.657   | 1.168 (0.623-2.188) | 0.628   | 1.258 (0.693-2.283) | 0.450   |
| Ethmoid sinus                     | 1.029 (0.681-1.555) | 0.894   | 0.976 (0.617-1.546) | 0.919   | 1.079 (0.698-1.667) | 0.733   |
| Tumor etiology                    |                     |         |                     |         |                     |         |
| DN-SCC                            | Ref                 |         | Ref                 |         | Ref                 |         |
| IP-SCC                            | 1.207 (0.808-1.802) | 0.359   | 1.256 (0.815-1.935) | 0.301   | 1.116 (0.742-1.678) | 0.599   |
| Years of diagnosis                |                     |         |                     |         |                     |         |
| 2000-2009                         | Ref                 |         | Ref                 |         | Ref                 |         |
| 2010-2016                         | 0.652 (0.437-0.973) | 0.036   | 0.756 (0.484-1.178) | 0.216   | 0.786 (0.521-1.188) | 0.251   |
| TNM stage (AJCC 8 <sup>th</sup> ) |                     |         |                     |         |                     |         |
| I-III                             | Ref                 |         | Ref                 |         | Ref                 |         |
| IV                                | 1.813 (1.149-2.862) | 0.011   | 2.693 (1.547-4.688) | < 0.001 | 3.011 (1.784-5.081) | < 0.001 |
| Treatment modalities              |                     |         |                     |         |                     |         |
| Surgery + radiotherapy            | Ref                 |         | Ref                 |         | Ref                 |         |
| Single-modality therapy           | 2.572 (1.778-3.721) | < 0.001 | 2.896 (1.941-4.320) | < 0.001 | 2.658 (1.817-3.888) | < 0.001 |
| Chemotherapy                      |                     |         |                     |         |                     |         |
| No                                | Ref                 |         | Ref                 |         | Ref                 |         |
| Yes                               | 1.365 (0.893-2.088) | 0.151   | 1.412 (0.890-2.238) | 0.143   | 1.314 (0.856-2.015) | 0.212   |
