# Supplementary material for: Sinonasal Inverted Papilloma–Associated and De Novo Squamous Cell Carcinoma: A Tale of Two Cities or Not
Source: MDPI journal article supplement (doi:10.3390/cancers14215211), 2022-10-24
Supplement: s1 [file s1]

**Table S2. Comparison of baseline characteristics of IP-SCC vs DN-SCC for S+RT cohort.**

| Characteristics                   | Before PSM |             |         | After PSM  |            |         |
|-----------------------------------|------------|-------------|---------|------------|------------|---------|
|                                   | IP-SCC     | DN-SCC      | p-value | IP-SCC     | DN-SCC     | p-value |
|                                   | N = 53 (%) | N = 112 (%) |         | N = 40 (%) | N = 40 (%) |         |
| Age, years                        |            |             |         |            |            |         |
| ≤ 54                              | 25 (47.2)  | 61 (54.5)   | 0.381   | 17 (42.5)  | 20 (50.0)  | 0.501   |
| > 54                              | 28 (52.8)  | 51 (45.5)   |         | 23 (57.5)  | 20 (50.0)  |         |
| Gender                            |            |             |         |            |            |         |
| Male                              | 42 (79.2)  | 81 (72.3)   | 0.340   | 30 (75.0)  | 30 (75.0)  | 1.000   |
| Female                            | 11 (20.8)  | 47 (27.7)   |         | 10 (25.0)  | 10 (25.0)  |         |
| Primary site                      |            |             |         |            |            |         |
| Nasal cavity                      | 23 (43.4)  | 25 (22.3)   | 0.014   | 14 (35.0)  | 12 (30.0)  | 0.900   |
| Maxillary sinus                   | 25 (47.2)  | 78 (69.6)   |         | 22 (55.0)  | 23 (57.5)  |         |
| Ethmoid sinus                     | 5 (9.4)    | 9 (8.0)     |         | 4 (10.0)   | 5 (12.5)   |         |
| Years of diagnosis                |            |             |         |            |            |         |
| 2000-2009                         | 23 (43.4)  | 55 (49.1)   | 0.493   | 15 (37.5)  | 19 (47.5)  | 0.366   |
| 2010-2016                         | 30 (56.6)  | 57 (50.9)   |         | 25 (62.5)  | 21 (52.5)  |         |
| T stage                           |            |             |         |            |            |         |
| T1-2                              | 2 (3.8)    | 10 (8.9)    | 0.491   | 1 (2.5)    | 1 (2.5)    | 0.936   |
| T3                                | 10 (18.9)  | 27 (24.1)   |         | 9 (22.5)   | 7 (17.5)   |         |
| T4a                               | 25 (47.2)  | 48 (42.9)   |         | 19 (47.5)  | 21 (52.5)  |         |
| T4b                               | 16 (30.2)  | 27 (24.1)   |         | 11 (27.5)  | 11 (27.5)  |         |
| N stage                           |            |             |         |            |            |         |
| N0                                | 48 (90.6)  | 87 (77.7)   | 0.045   | 35 (87.5)  | 35 (87.5)  | 1.000   |
| N+                                | 5 (9.4)    | 25 (22.3)   |         | 5 (12.5)   | 5 (12.5)   |         |
| TNM stage (AJCC 8 <sup>th</sup> ) |            |             |         |            |            |         |
| I-II                              | 2 (3.8)    | 7 (6.3)     | 0.549   | 1 (2.5)    | 1 (2.5)    | 0.883   |
| III                               | 9 (17.0)   | 25 (22.3)   |         | 8 (20.0)   | 6 (15.0)   |         |
| IV                                | 42 (79.2)  | 80 (71.4)   |         | 31 (77.5)  | 33 (82.5)  |         |
| Chemotherapy                      |            |             |         |            |            |         |
| No                                | 45 (84.9)  | 72 (64.3)   | 0.006   | 33 (82.5)  | 34 (85.0)  | 0.762   |
| Yes                               | 8 (15.1)   | 40 (35.7)   |         | 7 (17.5)   | 6 (15.0)   |         |
| Surgical approaches               |            |             |         |            |            |         |
| Endoscopic surgery                | 18 (19.2)  | 14 (12.5)   | 0.256   | 5 (12.5)   | 10 (25.0)  | 0.152   |
| Open surgery                      | 42 (80.8)  | 98 (87.5)   |         | 35 (87.5)  | 30 (75.0)  |         |
| Margin status                     |            |             |         |            |            |         |
| R0 resection                      | 24 (46.2)  | 81 (73.6)   | 0.001   | 22 (55.0)  | 21 (52.5)  | 0.823   |
| R1 / R2 resection                 | 28 (53.8)  | 29 (26.4)   |         | 18 (45.0)  | 19 (47.5)  |         |
| Radiation technique               |            |             |         |            |            |         |
| Non-IMRT                          | 20 (37.7)  | 51 (45.5)   | 0.345   | 14 (35.0)  | 17 (42.5)  | 0.491   |
| IMRT                              | 33 (62.3)  | 61 (54.5)   |         | 26 (65.0)  | 23 (57.5)  |         |
| Radiation dose, Gy                |            |             |         |            |            |         |
| ≤ 66                              | 25 (49.0)  | 64 (58.2)   | 0.277   | 19 (47.5)  | 22 (55.0)  | 0.502   |
| > 66                              | 26 (51.0)  | 46 (41.8)   |         | 21 (52.5)  | 18 (45.0)  |         |
